# Supplementary material for: Social Hierarchy Dictates Intestinal Radiation Injury in a Gut Microbiota-Dependent Manner
Source: MDPI journal article supplement (doi:10.3390/ijms232113189), 2022-10-29
Supplement: s1 [file s1]

## Supplementary materials

### 1 Supplementary Tables

**Table S1. All primers used in this experiment**

| Gene                            | Primer  | Sequence (5'-3')        |
|---------------------------------|---------|-------------------------|
| <b>Primers for PCR</b>          |         |                         |
| <i>GAPDH</i>                    | forward | TGTTTCCTCGTCCCGTAGA     |
|                                 | reverse | CAATCTCCACTTTGCCACTG    |
| <i>IL-1</i>                     | forward | TTGAAGAAGAGCCCATCCTC    |
|                                 | reverse | CAGCTCATATGGGTCCGAC     |
| <i>IL-6</i>                     | forward | TGTGCAATGGCAATTCTGAT    |
|                                 | reverse | GGTACTCCAGAAGACCAGAGGA  |
| <i>TNF-α</i>                    | forward | TTCTCATTCCTGCTTGTGGCA   |
|                                 | reverse | ACTTGGTGGTTTGCTACGACG   |
| <i>TFF-3</i>                    | forward | CTGGCTAATGCTGTTGGT      |
|                                 | reverse | TTGTTACACTGCTCCGATG     |
| <i>ZO-1</i>                     | forward | CCCTACCAACCTCGGCCTT     |
|                                 | reverse | AACGCTGGAAATAACCTCGTTC  |
| <i>Occludin</i>                 | forward | ATGTCCGGCCGATGCTCTC     |
|                                 | reverse | TTTGGCTGCTCTTGGGTCTGTAT |
| <b>Primers for sequencing</b>   |         |                         |
| 515F                            |         | GTGCCAGCMGCCGCGGTAA     |
| 806R                            |         | GGACTACHVGGGTWTCTAAT    |
| <b>16S rRNA Primers for PCR</b> |         |                         |
| <i>Bacterial universal</i>      | forward | ACTCCTACGGGAGGCAGCAG    |
|                                 | reverse | ATTACCGCGGCTGCTGG       |
| <i>A. muciniphila</i>           | forward | CAGCACGTGAAGGTGGGGAC    |
|                                 | reverse | CCTTGCGGTTGGCTTCAGAT    |
| <i>L. murinus</i>               | forward | AGAGTTTGATCCTGGCTCAG    |
|                                 | reverse | GGTTACCTTGTTACGACTT     |

**Table S2. The name of gut bacteria at the genus level in Dom and Sub mice**

|    |                               |
|----|-------------------------------|
| 1  | GCA-900066575                 |
| 2  | Lachnospiraceae_NK4A136_group |
| 3  | Erysipelotrichaceae_UCG-003   |
| 4  | Bifidobacterium               |
| 5  | Escherichia-Shigella          |
| 6  | Lachnoclostridium             |
| 7  | Helicobacter                  |
| 8  | Dorea                         |
| 9  | Alloprevotella                |
| 10 | Blautia                       |
| 11 | Mucispirillum                 |

|    |                                  |
|----|----------------------------------|
| 12 | Lachnospiraceae_UCG-001          |
| 13 | Monoglobus                       |
| 14 | Bacteroides                      |
| 15 | Oscillibacter                    |
| 16 | Colidextribacter                 |
| 17 | Lactobacillus                    |
| 18 | Alistipes                        |
| 19 | Ligilactobacillus                |
| 20 | Prevotellaceae_NK3B31_group      |
| 21 | Allobaculum                      |
| 22 | Limosilactobacillus              |
| 23 | [Eubacterium]_xylanophilum_group |
| 24 | unidentified_Lachnospiraceae     |
| 25 | [Eubacterium]_fissicatena_group  |
| 26 | Rikenella                        |
| 27 | Roseburia                        |
| 28 | Parasutterella                   |
| 29 | Dubosiella                       |
| 30 | Muribaculum                      |
| 31 | Ileibacterium                    |
| 32 | Pseudomonas                      |
| 33 | Akkermansia                      |
| 34 | Prevotellaceae_UCG-001           |
| 35 | Parabacteroides                  |

**Table S3. The name of gut bacteria at the genus level in Dom and Sub mice before and after radiation**

|    |                                  |
|----|----------------------------------|
| 1  | Allobaculum                      |
| 2  | Ileibacterium                    |
| 3  | Mucispirillum                    |
| 4  | Parabacteroides                  |
| 5  | Roseburia                        |
| 6  | A2                               |
| 7  | Ligilactobacillus                |
| 8  | Lachnospiraceae_UCG-001          |
| 9  | Candidatus_Saccharimonas         |
| 10 | Limosilactobacillus              |
| 11 | Unidentified_Lachnospiraceae     |
| 12 | Rikenella                        |
| 13 | [Eubacterium]_xylanophilum_group |
| 14 | Lactobacillus                    |
| 15 | Muribaculum                      |
| 16 | Oscillibacter                    |
| 17 | Helicobacter                     |

|    |                                 |
|----|---------------------------------|
| 18 | Alistipes                       |
| 19 | Blautia                         |
| 20 | Dubosiella                      |
| 21 | Akkermansia                     |
| 22 | ASF356                          |
| 23 | Prevotellaceae_NK4A136_group    |
| 24 | Colidextribacter                |
| 25 | Marinobacter                    |
| 26 | Leuconostoc                     |
| 27 | Bacteroides                     |
| 28 | Acetobacter                     |
| 29 | Parasutterella                  |
| 30 | Prevotellaceae_UCG-001          |
| 31 | Prevotellaceae_NK3B31_group     |
| 32 | Bifidobacterium                 |
| 33 | Alloprevotella                  |
| 34 | Pseudomonas                     |
| 35 | [Eubacterium]_fissicatena_group |

## 2 Supplementary Figures

Figure S1

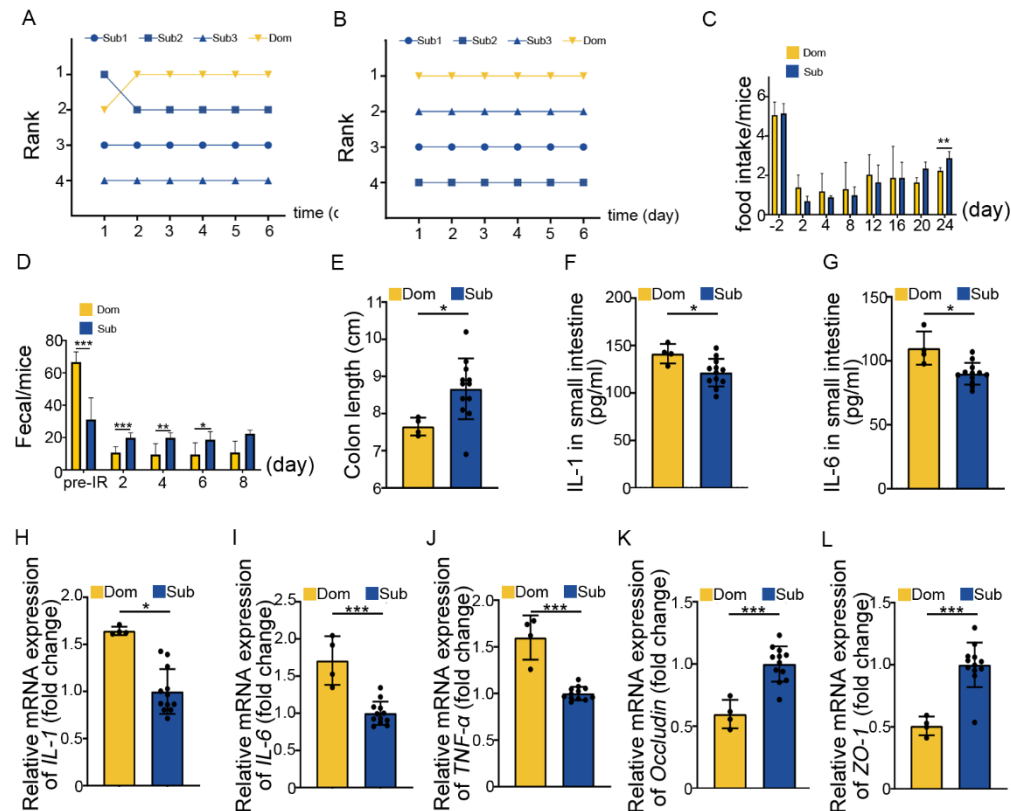

**Figure S1.** Social hierarchy determines the degree of radiation intestinal injury. (A and B) The rank

positions of one cage of mice tested daily over 6 days. (C) Food intake per mouse. (D) Number of formed fecal pelleted per mouse. (E) Colon length of Dom and Sub. (F and G) The protein levels of IL-1 and IL-6 in small intestine were measured by ELISA. (H-L) The mRNA expression levels of *IL-1*, *IL-6*, *TNF- $\alpha$* , *Occludin* and *ZO-1* were examined in small intestine tissues from Dom and Sub mice by qRT-PCR. (Statistically significant differences are indicated: Student's *t* test, *n*=4 in Dom group, *n*=12 in Sub group, \* *p* < 0.05, \*\* *p* < 0.01 and \*\*\* *p* < 0.001).

Figure S2

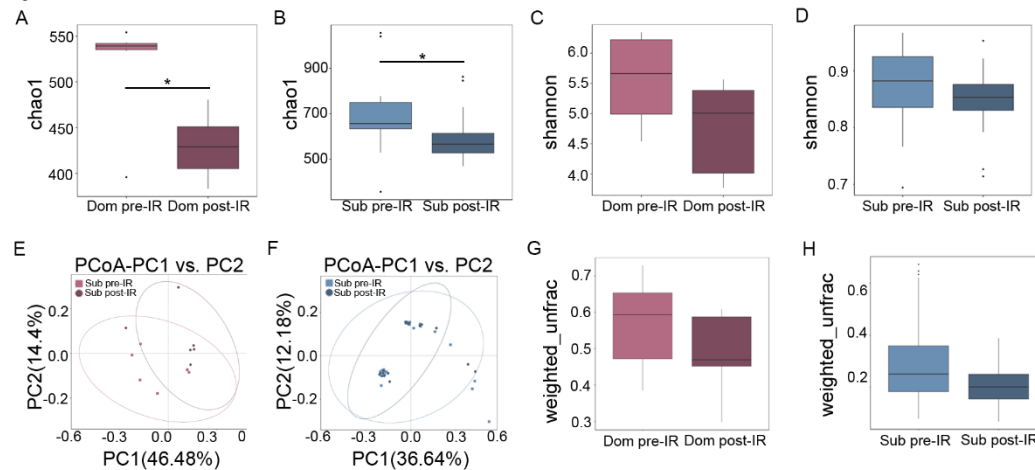

**Figure S2.** Gut bacteria community shifts significantly in Dom mice following irradiation. (A and B) The  $\alpha$ -diversity of enteric bacteria of Dom mice and Sub mice before and after radiation was compared by chao1 index. (C and D) The  $\alpha$ -diversity of enteric bacteria of Dom mice and Sub mice before and after radiation was compared by Shannon index. (E and F) PCA were used to examine the alteration of intestinal bacteria taxonomic pattern. (G and H) The  $\beta$ -diversity of enteric bacteria of Dom mice (G) and Sub mice (H) was compared by weighted unfrac analysis. (Statistically significant differences are indicated: Student's *t* test, *n*=6 in Dom pre-IR and Dom post-IR group, *n*=18 in Sub pre-IR and Sub post-IR group, \* *p* < 0.05, \*\* *p* < 0.01 and \*\*\* *p* < 0.001).

Figure S3

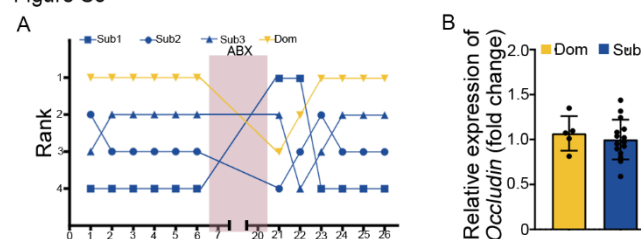

**Figure S3.** ABX treatment eliminated the difference in intestinal radiation injury between Dom and Sub mice. (A) The rank positions of one cage of mice tested daily before and after ABX treatment. (B) The mRNA expression levels of *Occludin* were examined in small intestine tissues from mice by qRT-PCR. (Statistically significant differences are indicated: Student's *t* test, *n*=10 per group, \* *p* < 0.05, \*\* *p* < 0.01 and \*\*\* *p* < 0.001).

Figure S4

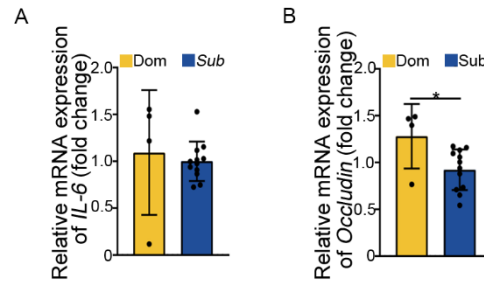

**Figure S4.** FMT treatment eliminated the difference in intestinal radiation injury between Dom and Sub mice. (A and B) The mRNA expression levels of *IL-6* and *Occludin* were examined in small intestine tissues from mice by qRT-PCR. (Statistically significant differences are indicated: Student's *t* test,  $n=10$  per group, \*  $p < 0.05$ , \*\*  $p < 0.01$  and \*\*\*  $p < 0.001$ ).

Figure S5

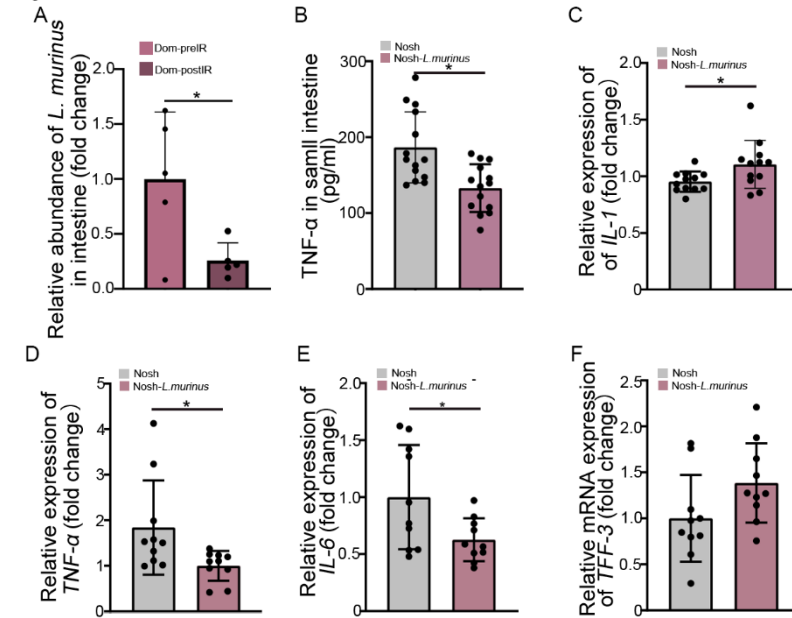

**Figure S5** *L. murinus* is able to alleviate intestinal radiation toxicity in non-social hierarchy mice. (A) Relative abundance of *L. murinus* in small intestine of Dom mice before and after 13 Gy TAI. (B) The protein levels of TNF- $\alpha$  in small intestine were measured by ELISA. (C-F) The mRNA expression levels of *IL-1*, *TNF- $\alpha$* , *IL-6* and *TFF-3* were examined in small intestine tissues by qRT-PCR. (Statistically significant differences are indicated: Student's *t* test,  $n=10$  per group, \*  $p < 0.05$ , \*\*  $p < 0.01$  and \*\*\*  $p < 0.001$ ).

Figure S6

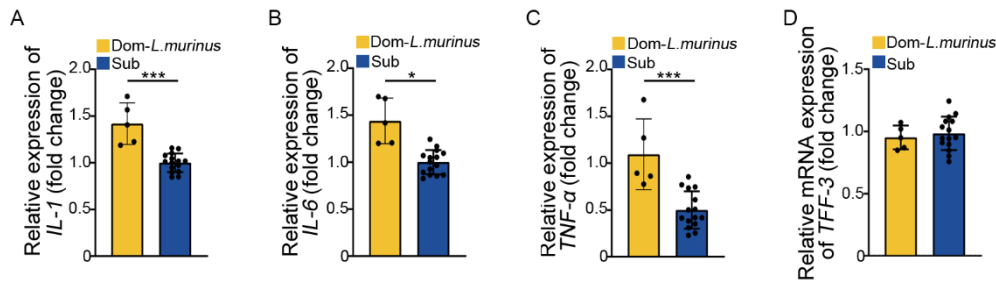

**Figure S6.** The radioprotection of *L. murinus* is not obvious for Dom mice. (A-D) The mRNA expression levels of *IL-1*, *IL-6*, *TNF-α* and *TFF-3* were examined in small intestine tissues by qRT-PCR. (Statistically significant differences are indicated: Student's *t* test, n=4 in Dom group, n=12 in Sub group, \*  $p < 0.05$ , \*\*  $p < 0.01$  and \*\*\*  $p < 0.001$ ).

Figure S7

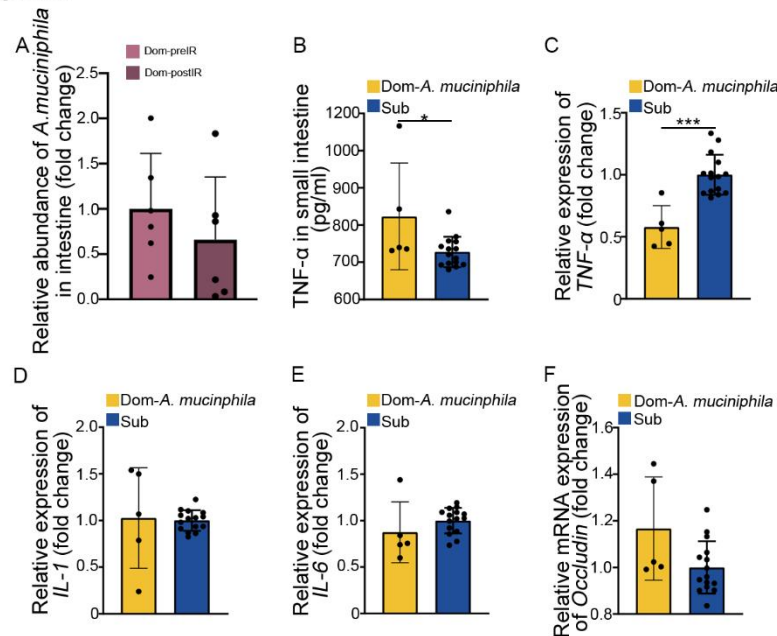

**Figure S7.** *A. muciniphila* colonizes in GI tract of Dom mice stably to mitigate intestinal radiation injury. (A) Relative abundance of *A. muciniphila* in small intestine of Dom mice before and after 13 Gy TAI. (B) The protein levels of TNF-α in small intestine were measured by ELISA. (C-F) The mRNA expression levels of *TNF-α*, *IL-1*, *IL-6* and *Occludin* were examined in small intestine tissues by qRT-PCR. (Statistically significant differences are indicated: Student's *t* test, n=4 in Dom group, n=12 in Sub group, \*  $p < 0.05$ , \*\*  $p < 0.01$  and \*\*\*  $p < 0.001$ ).
